# Supplementary material for: New Insights into the Enhancement of Adventitious Root Formation Using N,N′-Bis(2,3-methylenedioxyphenyl)urea
Source: MDPI journal article supplement (doi:10.3390/plants12203610), 2023-10-18

## Supplementary figures

**Figure S1.** Representative phenotypes of *Arabidopsis* pavement cells obtained under different treatments: A) hormone free (HF) as control condition; B) 1  $\mu$ M 2,3-MDPU; C) 1  $\mu$ M IBA; D) 1  $\mu$ M IBA plus 1  $\mu$ M 2,3-MDPU. The pictures were taken 7 days after sowing by confocal laser scanning microscopy.

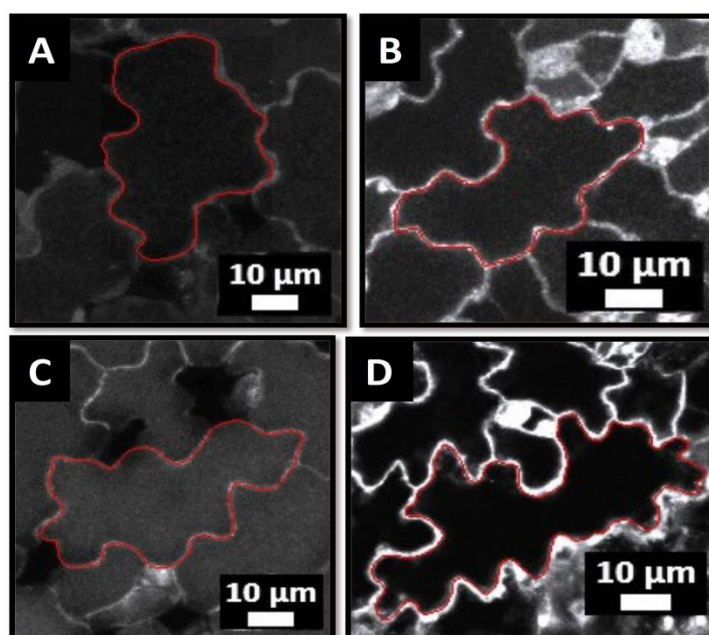

**Figure S2.** A) Dependence of the reaction rate of ZmCKX1 on trans-zeatin (tZ) concentration in the 0-100  $\mu\text{M}$  range. The fitting of the data points ( $n=3$  at each concentration) to the Michaelis-Menten equation (solid line) yielded a  $K_m$  of 6.8  $\mu\text{M}$ . B) Lineweaver-Burk plots of the kinetics measured in the absence and presence of 2,3-MDPU at 5 and 10  $\mu\text{M}$  concentration.

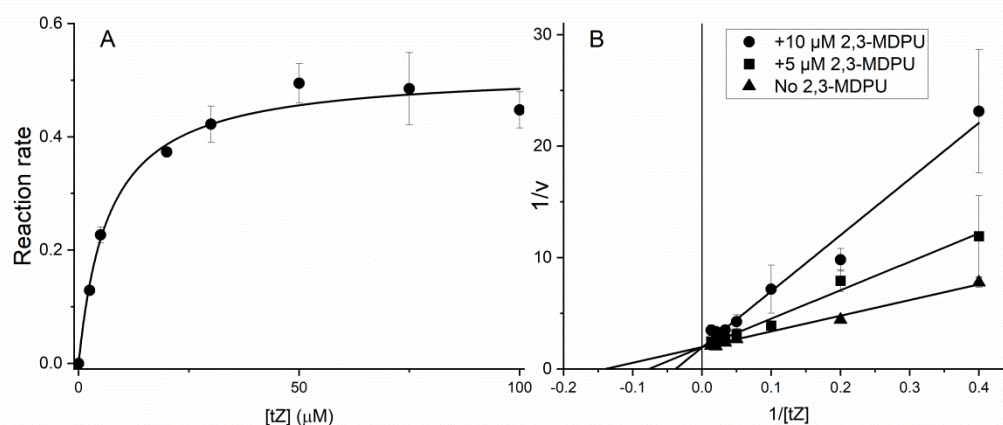

Supplement: s1 [file s1]
